# Supplementary material for: The broad spectrum mixed-lineage kinase 3 inhibitor URMC-099 prevents acute microgliosis and cognitive decline in a mouse model of perioperative neurocognitive disorders
Source: PubMed Central journal article supplement (PMC6816182; doi:10.1186/s12974-019-1582-5), 2019-10-28

Vehicle, post-surgery

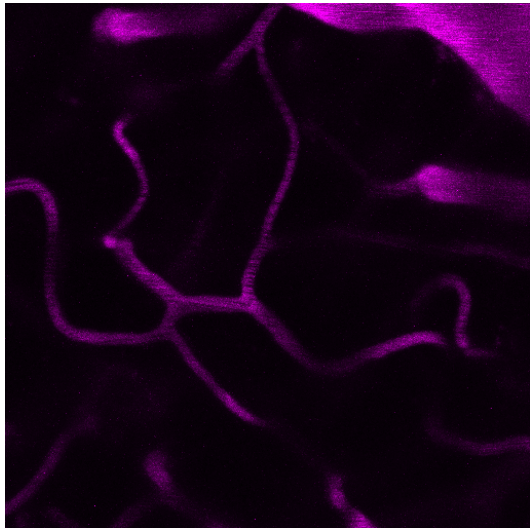

URMC-099, post-surgery

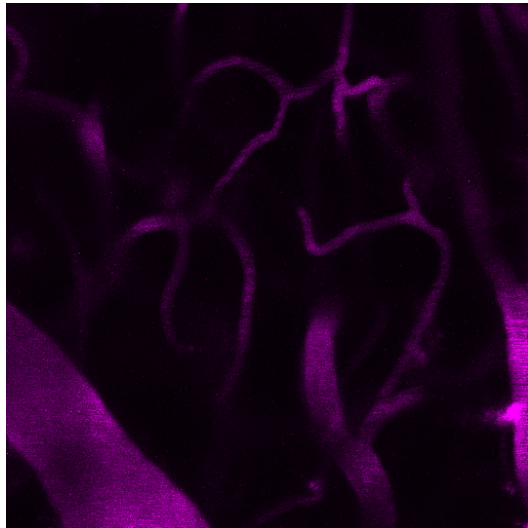

Supplement: 12974_2019_1582_MOESM5_ESM.pdf [file 12974_2019_1582_MOESM5_ESM.pdf]
